# Supplementary material
Source: ML conference proceedings conference paper supplement (https://proceedings.mlr.press/v51/li16e.html)
Supplement: Supplementary file 1 [file li16e-supp.pdf]

## A Experiments

Here we report the results of REMBO (Wang et al., 2013) and SMAC (Hutter et al., 2011) on the synthetic data in Section 5.

### A.1 Other Algorithms

For REMBO, the best parameter we try is to assume the number of underlying lower dimensions as  $D/4$ . The simple regret we get is 76.6 and 93.4 for  $D = 50$  and  $D = 100$ , respectively. When we increase the number of lower dimensions, however, the performance degrades. For instance, when we use 25 dimensions for  $D = 50$ , the regret is 424. We address this result to imperfect optimization of acquisition function. Moreover, it is not surprising that the regret increases when we increase  $D$ . If the low dimensional embedding does not exist, we lose more information for larger  $D$ .

We also study the random-forests-based algorithm (SMAC) (Hutter et al., 2011) by using the code provided by the authors<sup>1</sup>. Hutter et al. (2011) demonstrate SMAC has good performance on solving combinatorial problem with 76 dimensions. However, in our synthetic data, the average regret after 1000 iterations for  $D = 50$  and  $D = 100$  are 130.5 and 460.1 respectively, which is generally worse than than GP-based methods. Although more iterations will result in better performance, it worths further studying to improve this method.

## B Technical Proofs

In the following, we use superscript to indicate the index of the vector, matrix and tensor.

### B.1 Proof of Theorem 2

**Theorem 1.** *Kandasamy et al. (2015)* Suppose  $f$  is constructed by sampling  $f^{(j)} \sim \mathcal{GP}(\mathbf{0}, \kappa^{(j)})$  for  $j = 1, \dots, M$  and then adding them. Let all kernels  $\kappa^{(j)}$  satisfy certain smooth and bounded conditions Kandasamy et al. (2015). If we maximize the acquisition function  $\tilde{\varphi}_t$  to within  $\tilde{O}(t^{-1/2})$  accuracy at time step  $t$  and choose  $\beta_t = \tilde{O}(d \log t)$ , **Add-GP-UCB** attains simple regret  $S_T \in \tilde{O}\left(\sqrt{D\gamma_T \log T/T}\right)$  with high probability.

Since  $f$  is projected-additive function on  $\mathbf{x}$ ,  $g$  is additive on the projected data  $\mathbf{z} = \mathbf{W}^\top \mathbf{x}$ . Then we could apply Theorem 1 directly to completes the proof.

### B.2 Proof of Proposition 4

By mean value theorem, there exists  $\mathbf{0} \preceq \mathbf{z}' \preceq \mathbf{z}$  such that  $\tilde{f}(\mathbf{z}) = \tilde{f}(\mathbf{0}) + \nabla \tilde{f}(\mathbf{0})^\top \mathbf{z} + \frac{1}{2} \mathbf{z}^\top H(\mathbf{z}') \mathbf{z}$ , where  $H(\mathbf{z}') = \nabla^2 f(\mathbf{z}')$ . We construct  $g$  by  $g(\mathbf{z}) = \sum_{d=1}^D \frac{1}{D} \tilde{f}(\mathbf{0}) + (\nabla f(\mathbf{z}))^{(d)} \mathbf{z}^{(d)} + \frac{1}{2} (H(\mathbf{z}')^{(d,d)} (\mathbf{z}^{(i)})^2)$ . Since each element in  $H(\mathbf{z}')$  is bounded by Assumption 3,  $|\tilde{f}(\mathbf{z}) - g(\mathbf{z})| = O(\|\mathbf{z}\|^2)$ .

### B.3 Proof of Proposition 4

By mean value theorem, there exists  $\mathbf{0} \preceq \mathbf{z}' \preceq \mathbf{z}$  such that  $\tilde{f}(\mathbf{z}) = \tilde{f}(\mathbf{0}) + \nabla \tilde{f}(\mathbf{0})^\top \mathbf{z} + \frac{1}{2} \mathbf{z}^\top H(\mathbf{0}) \mathbf{z} + \frac{1}{6} T(\mathbf{z}') \times_1 \mathbf{z} \times_2 \mathbf{z} \times_3 \mathbf{z}$ , where  $T(\mathbf{z}')$  is the tensor of the third derivatives of  $\tilde{f}(\mathbf{z}')$ . Let denote the SVD of  $H(\mathbf{0})$  as  $H(\mathbf{0}) = \mathbf{U} \Sigma \mathbf{U}^\top$ , where  $\mathbf{U} \mathbf{U}^\top = \mathbf{I}$  and  $\Sigma$  is diagonal. Then

$$\begin{aligned} \tilde{f}(\mathbf{z}) &= \tilde{f}(\mathbf{0}) + \nabla \tilde{f}(\mathbf{0})^\top \mathbf{U} \mathbf{U}^\top \mathbf{z} + \frac{1}{2} \mathbf{z}^\top \mathbf{U} \Sigma \mathbf{U}^\top \mathbf{z} + \\ &\quad \frac{1}{6} T(\mathbf{z}') \times_1 (\mathbf{U} \mathbf{U}^\top \mathbf{z}) \times_2 (\mathbf{U} \mathbf{U}^\top \mathbf{z}) \times_3 (\mathbf{U} \mathbf{U}^\top \mathbf{z}) \\ &= \tilde{f}(\mathbf{0}) + \mathbf{g}^\top \tilde{\mathbf{z}} + \frac{\tilde{\mathbf{z}}^\top \Sigma \tilde{\mathbf{z}}}{2} + \frac{\tilde{T}(\mathbf{z}') \times_1 \tilde{\mathbf{z}} \times_2 \tilde{\mathbf{z}} \times_3 \tilde{\mathbf{z}}}{6}, \end{aligned}$$

where  $\mathbf{g} = \mathbf{U}^\top \nabla \tilde{f}(\mathbf{0})$ , and  $\tilde{T}(\mathbf{z}') = T(\mathbf{z}') \times_1 \mathbf{U} \times_2 \mathbf{U} \times_3 \mathbf{U}$ . Then we construct  $h$  as  $h(\mathbf{z}) = \sum_{d=1}^D \frac{1}{D} \tilde{f}(\mathbf{0}) + \mathbf{g}^{(d)} \tilde{\mathbf{z}}^{(d)} + \frac{1}{2} \tilde{\Sigma}^{(d,d)} (\tilde{\mathbf{z}}^{(i)})^2 + \frac{1}{6} \tilde{T}(\tilde{\mathbf{z}}')^{(d,d,d)} (\tilde{\mathbf{z}}^{(i)})^3$ . Since  $T$  is bounded by Assumption 3, and  $\|\mathbf{U}\| = 1$ , so  $\tilde{T}$  is still bounded. Therefore,  $|\tilde{f}(\mathbf{z}) - h(\mathbf{z})| = O(\|\mathbf{z}\|^3)$ .

### B.4 Proof of Corollary 8

Using the same proof of Proposition 4 by replacing  $\mathbf{0}$  with  $\mathbf{z}_*$  and using the decomposition  $-\mathbf{Q} \mathbf{Q}^\top$  completes the proof.

### B.5 Proof of Theorem 6

The proof is based on the following lemmas from Srinivas et al. (2010). Here we use  $\tilde{\mu}_t(\mathbf{x})$  to denote the mean function based on the biased  $\tilde{y}$ , and  $\mu_t(\mathbf{x})$  to denote the mean function based on  $y$ .

**Lemma 2.** *Srinivas et al. (2010)* Set  $\beta_t = \tilde{O}(d \log t)$ . Then  $|g(\mathbf{x}_t) - \mu_{t-1}(\mathbf{x}_t)| \leq \beta_t^{1/2} \sigma_{t-1}(\mathbf{x}_t)$  and  $g(\mathbf{x}_*) \leq \mu_{t-1}(\mathbf{x}_t) + \beta_t^{1/2} \sigma_{t-1}(\mathbf{x}_t) + \frac{1}{t^2}$  with high probability.

**Lemma 3.** Set  $\beta_t = \tilde{O}(d \log t)$ . Then  $|g(\mathbf{x}_t) - \tilde{\mu}_{t-1}(\mathbf{x}_t)| \leq \beta_t^{1/2} \sigma_{t-1}(\mathbf{x}_t) + C\epsilon$  and  $g(\mathbf{x}_*) \leq \tilde{\mu}_{t-1}(\mathbf{x}_t) + \beta_t^{1/2} \sigma_{t-1}(\mathbf{x}_t) + C\epsilon + \frac{1}{t^2}$  with high probability.

*Proof.* Applying Lemma 3 and  $|f(\mathbf{x}) - g(\mathbf{x})| \leq \epsilon$  completes the proof.  $\square$

**Lemma 4.** Set  $\beta_t = \tilde{O}(d \log t)$ . With high probability, the regret is bounded as follows:  $r_t \leq 2\beta_t^{1/2} \sigma_{t-1}(\mathbf{x}_t) + 2C\epsilon + \frac{1}{t^2}$ .

<sup>1</sup><http://www.cs.ubc.ca/labs/beta/Projects/SMAC/>.

---

*Proof.* By Lemma 3, we have  $g(\mathbf{x}_*) \leq \tilde{\mu}_{t-1}(\mathbf{x}_t) + \beta_t^{1/2} \sigma_{t-1}(\mathbf{x}_t) + C\epsilon + \frac{1}{t^2}$ . Therefore,

$$\begin{aligned} r_t &= g(\mathbf{x}_*) - g(\mathbf{x}_t) \\ &\leq \tilde{\mu}_{t-1}(\mathbf{x}_t) + \beta_t^{1/2} \sigma_{t-1}(\mathbf{x}_t) + C\epsilon + 1/t^2 - g(\mathbf{x}_t) \\ &\leq 2\beta_t^{1/2} \sigma_{t-1}(\mathbf{x}_t) + 2C\epsilon + 1/t^2, \end{aligned}$$

which completes the proof.  $\square$

**Lemma 5.** *Srinivas et al. (2010)* Set  $\beta_t = \tilde{O}(d \log t)$ , with high probability,  $\sum_{t=1}^T 2\beta_t^{1/2} \sigma_{t-1}(\mathbf{x}_t) \leq \sqrt{C_1 T \beta_T \gamma_T}$ , where  $C_1$  is a constant.

Then by Lemma 4 and Lemma 5, the simple regret is bounded by

$$\begin{aligned} \frac{1}{T} \sum_{t=1}^T r_t &\leq \sqrt{\frac{C_1 \beta_T \gamma_T}{T}} + 2C\epsilon + \sum_{t=1}^T \frac{1}{t^2} \\ &= \tilde{O}\left(\sqrt{\frac{d\gamma_T}{T}} + \epsilon\right) \end{aligned}$$

## B.6 Proof of Corollary 7

Let  $\mathbf{u}_* = \operatorname{argmax}_{\mathbf{x}} f(\mathbf{x})$  and  $\mathbf{v}_* = \operatorname{argmax}_{\mathbf{x}} g(\mathbf{x})$ . Since  $|f(\mathbf{x}) - g(\mathbf{x})| \leq \epsilon$ , we  $f(\mathbf{u}_*) - g(\mathbf{v}_*) \leq f(\mathbf{u}_*) - g(\mathbf{u}_*) \leq \epsilon$ . Combining with Theorem 6, the simple regret on  $f$  is bounded by

$$\begin{aligned} \frac{1}{T} \sum_{t=1}^T f(\mathbf{u}_*) - f(\mathbf{x}_t) &\leq \frac{1}{T} \sum_{t=1}^T g(\mathbf{v}_*) + C\epsilon - g(\mathbf{x}_t) + C\epsilon \\ &= 2C\epsilon + \frac{1}{T} \sum_{t=1}^T g(\mathbf{v}_*) - g(\mathbf{x}_t) \\ &= \tilde{O}\left(\sqrt{\frac{d\gamma_T}{T}} + \epsilon\right), \end{aligned}$$

with high probability.

## References

- Hutter, F., Hoos, H. H., and Leyton-Brown, K. (2011). Sequential model-based optimization for general algorithm configuration. In *Proceedings of the 5th International Conference on Learning and Intelligent Optimization*.
- Kandasamy, K., Schneider, J., and Póczos, B. (2015). High Dimensional Bayesian Optimisation and Bandits via Additive Models. In *International Conference on Machine Learning*.
- Srinivas, N., Krause, A., Kakade, S., and Seeger, M. (2010). Gaussian Process Optimization in the Bandit Setting: No Regret and Experimental Design. In *International Conference on Machine Learning*.
- Wang, Z., Zoghi, M., Hutter, F., Matheson, D., and de Freitas, N. (2013). Bayesian Optimization in High Dimensions via Random Embeddings. In *International Joint Conference on Artificial Intelligence*.
